# Supplementary material
Source: publisher figshare collection journal article supplement (https://gsapubs.figshare.com/ndownloader/files/23300738)
Supplement: Supplementary file 1 [file 23300738]

## Sheet: Sheet2
		12AM111		11AM26		11AM32		11AM91		11AM23		11AM12		11AM22		11AM27		11AM30		11AM45		12AM95		12AM96		12AM106		11AM02		11AM10		11AM86		11AM19		11AM50		11AM55		11AM04		11AM07		11AM08		11AM77		11AM35
Sam No:		grains	%		%		%		%		%		%		%		%		%		%		%		%		%		%		%		%		%		n%		%		%		%		%		%		%
Qm		111	37	23	7.66	62	20.6	74	24.6	84	28	91	30.3	104	34.6	96	32	50	16.6	97	32.3	90	30	84	28	74	24.6	110	36.6	114	38	106	35.3	101	33.66	67	22.3	157	52.3	75	25	105	35	98	32.66	86	28.6	76	25.3
Qp		9	3	57	19	9	3	14	4.6	15	5	14	4.6	15	5	8	2.6	19	6.3	13	4.3	29	9.66	16	5.3	18	6	29	9.6	38	12.6	9	3	25	8.33	19	6.3	44	14.6	8	2.6	25	8.33	17	5.66	15	5	21	7
Qt		0	0	0	0	2	0.6	0	0	1	0.3	1	0.3	1	0.3	0	0	1	0.3			3	1	0	0	1	0.3	3	1	3	1	1	0.3	8	2.66	4	1.3	3	1	0	0	6	2	5	1.66	0	0	2	0.6
C		6	2	0	0	10	3.3	5	1.6	7	2.3	5	1.6	0	0	26	8.6	25	8.3	2	0.6	5	1.66	0	0	4	1.3	8	2.6	4	1.3	2	0.6	6	2	2	0.6	1	0.3	5	1.6	9	3	4	1.33	0	0	6	2
P		45	15	22	7.3	90	30	95	31.6	58	19.3	57	19	50	16.6	74	24.6	78	26	44	14.6	86	28.66	101	33.6	86	28.6	31	10.3	15	5	78	26	74	24.66	48	16	26	8.6	80	26.6	73	24.33	81	27	87	29	61	20.3
K		2	0.6	2	0.66	6	2	1	0.3	6	2	1	0.3	1	0.3	10	3.3	0	0	3	1	4	1.33	4	1.3	2	0.6	5	1.6	3	1	0	0	4	1.33	4	1.3	1	0.3	3	1	6	2	4	1.33	0	0	7	2.3
Lv		47	15.6	196	65.3	89	29.6	24	8	32	10.6	46	15.3	22	7.3	14	4.6	55	18.3	57	19	32	10.66	26	8.6	44	14.6	34	11.3	26	8.6	22	7.3	29	9.66	59	19.6	41	13.6	35	11.6	30	10	37	12.33	19	6.3	35	11.6
Ls		13	4.3	0	0	23	7.6	58	19.3	72	24	66	22	71	23.6	57	19	71	23.6	68	22.6	37	12.33	47	15.6	53	17.6	18	6	88	29.3	59	19.6	41	13.66	64	21.3	24	8	59	19.6	31	10.33	40	13.33	58	19.3	73	24.33
Tqm		11	3.6	0	0	2	0.6	2	0.6	2	0.6	2	0.6	1	0.3	1	0.3	0	0	2	0.6	6	2	2	0.6	1	0.3	18	6	1	0.3	3	1	1	0.33	11	3.6	0	0	1	0.3	2	0.66	3	1	0	0	9	3
Mp		22	7.3	0	0	3	1	24	8	22	7.3	15	5	15	5	7	2.3	1	0.3	0	0	1	0.33	19	6.3	12	4	40	13.3	6	2	18	6	0	0	17	5.6	1	0.3	22	7.3	0	0	0	0	33	11	7	2.3
M				0	0																	0	0											0	0							0	0	0	0
Lm		34	11.3	0	0	4	1.3	3	1	1	0.3	2	0.6	20	6.6	7	2.3	0	0	14	4.6	7	2.33	1	0.3	5	1.6	4	1.3	2	0.6	2	0.6	11	3.66	5	1.6	2	0.6	12	4	13	4.33	11	3.66	2	0.6	3	1
		300	99.7	300	99.92	300	99.6	300	99.6	300	99.7	300	99.6	300	99.6	300	99.6	300	99.7	300	99.6	300	99.96	300	99.6	300	99.5	300	99.6	300	99.7	300	99.7	300	99.95	300	99.5	300	99.6	300	99.6	300	99.98	300	99.96	300	99.8	300	99.73
			12AM111		11AM26		11AM32		11AM91		11AM23		11AM12		11AM22		11AM27		11AM30		11AM45		12AM95		12AM96		12AM106		11AM02		11AM10		11AM86		11AM19		11AM50		11AM55		11AM04		11AM07		11AM08		11AM77		11AM35
Q	(Qm+Qp+Qt+C)		42		26.66		27.6		30.6		35.6		37		40		43.2		31.6		37.2		42.32		33.3		32.2		49.8		53		39.3		46.65		30.6		68.2		29.2		48.33		41.32		33.6		35
Qm			37		7.66		20.6		24.6		28		30.3		34.6		32		16.6		32.3		30		28		24.6		36.6		38		35.3		33.66		22.3		52.3		25		35		32.66		28.6		25.3
F	(P+K)		15.6		8		32		32		21.3		19.3		17		28		26		15.6		30		34.9		29.2		12		6		26		26		17.3		9		27.6		26.33		28.33		29		22.6
P			15		7.3		30		31.6		19.3		19		16.6		24.6		26		14.6		28.66		33.6		28.6		10.3		5		26		24.66		16		8.6		26.6		24.33		27		29		20.3
k			0.6		0.66		2		0.3		2		0.3		0.3		3.3		0		1		1.33		1.3		0.6		1.6		1		0		1.33		1.3		0.3		1		2		1.33		0		2.3
L	(Lv+Ls+Tqm+Mp)		31		65.3		38.8		36		37.6		43		36.3		26.3		42.3		42.2		25.33		31.1		36.5		36.6		40.3		34		23.66		50.2		22		39		21		26.66		36.6		41.6
Lt	(Lv+ Ls+Tqm+Mp+Qp+Qt+C)		36		84.3		45.8		42.2		45.2		49.6		41.6		37.5		57.3		47.2		37.66		36.4		44.1		49.8		56		38		36.66		58.5		38		43.2		34.33		35.32		41.6		51.2
Lv			15.6		65.3		29.6		8		10.6		15.3		7.3		4.6		18.3		19		10.66		8.6		14.6		11.3		8.6		7.3		9.66		19.6		13.6		11.6		10		12.33		6.3		11.6
Ls	(Ls+C)		6.3		0		11		21		26.3		23.6		23.6		27.6		32		23.2		14		15.6		18.9		8.6		30.6		20.3		15.66		22		8.3		21.2		13.33		14.66		19.3		26.3
Lm	(Qp+Qt+Tqm+Mp)		14		19		5.2		13.2		13.3		10.6		10.6		5.2		7		5		13		12.2		10.6		30		16		10.3		11.33		16.8		16		10.2		11		8.32		16		10.2
Lsm	(Ls+Tqm+Mp)		14.3		0		9.2		28		32		27.6		29		21.6		24		23.2		14.66		22.5		21.9		25.3		31.6		26.6		14		30.6		8.3		27.3		11		14.33		30.3		27
Lq	(Qp+Qt+C)		5		19		7		6.2		7.6		6.6		5.3		11.2		15		5		12.32		5.3		7.6		13.2		15		4		13		8.3		16		4.2		13.33		8.66		5		9.6
			12AM111		11AM26		11AM32		11AM91		11AM23		11AM12		11AM22		11AM27		11AM30		11AM45		12AM95		12AM96		12AM106		11AM02		11AM10		11AM86		11AM19		11AM50		11AM55		11AM04		11AM07		11AM08		11AM77		11AM35
Q		88.6	47.4	99.96	26.68	98.4	28.04	98.6	31.03	94.5	37.67	99.3	37.26	93.3	42.87	97.5	44.3	99.9	31.7	95	39.16	97.65	43.33	99.3	33.53	97.9	32.89	98.4	50.62	99.3	53.37	99.3	39.57	96.31	48.43	98.1	31.19	99.2	68.75	95.8	30.48	95.66	50.52	96.31	42.9	99.2	33.87	99.2	35.29
F			17.62		8		32.53		32.45		22.55		19.43		18.23		28.73		26		16.42		30.74		35.14		29.83		12.19		6.05		26.18		27		17.64		9.08		28.82		27.52		29.41		29.24		22.78
L			34.98		65.32		39.43		36.51		39.78		43.31		38.9		26.97		42.3		44.42		25.93		31.31		37.28		37.19		40.58		34.25		24.57		51.17		22.17		40.7		21.96		27.69		36.89		41.93
		88.6	100	99.96	100	98.4	100	98.6	99.99	94.5	100	99.3	100	93.3	100	97.5	100	99.9	100	95	100	97.65	100	99.3	99.98	97.9	100	98.4	100	99.3	100	99.3	100	96.31	100	98.1	100	99.2	100	95.8	100	95.66	100	96.31	100	99.2	100	99.2	100
Qm		88.6	41.76	99.96	7.69	98.4	20.93	98.8	24.89	94.5	29.62	99.2	30.54	93.2	37.13	97.5	32.82	99.9	16.7	95.1	33.97	97.66	30.71	99.3	28.19	97.9	25.12	98.4	37.19	100	38	99.3	35.54	96.32	34.94	98.1	22.73	99.3	52.66	95.8	26.09	95.66	36.58	96.31	33.91	99.2	28.83	99.1	25.54
f			17.61		8		32.53		32.38		22.58		19.46		18.24		28.72		26		16.4		30.71		35.16		29.82		12.19		6		26.18		27		17.64		9.08		28.82		27.54		29.41		29.23		22.8
Lt			40.63		84.31		46.54		42.71		47.38		50		44.63		38.46		57.3		49.63		38.58		36.65		45.06		50.62		56		38.28		38.06		59.63		38.26		45.09		35.88		36.67		41.94		51.66
		88.6	100	99.96	100	98.4	100	98.8	99.98	94.5	99.58	99.2	100	93.2	100	97.5	100	99.9	100	95.1	100	97.66	100	99.3	100	97.9	100	98.4	100	100	100	99.3	100	96.32	100	98.1	100	99.3	100	95.8	100	95.66	100	96.31	99.99	99.2	100	99.1	100
Qm		52.6	70.34	15.62	49.03	52.6	39.16	56.5	43.53	49.3	56.79	49.6	61.08	51.5	67.18	59.9	53.42	42.6	38.96	47.9	67.43	60	50	62.9	44.51	53.8	45.72	48.5	75.46	44	86.36	61.3	57.58	59.65	56.42	39.6	56.32	61.2	85.45	52.6	47.53	61.33	57.06	61	53.54	57.6	49.65	47.9	52.81
P			28.52		46.75		57.04		55.92		39.16		38.32		32.24		41.08		61.03		30.48		47.76		53.41		53.15		21.25		11.36		42.42		41.36		40.4		14.05		50.57		39.67		44.28		50.35		42.39
K			1.14		4.22		3.8		0		4.05		0.6		0.58		5.5		0		2.09		2.24		2.08		1.13		3.29		2.28		0		2.22		3.28		0.5		1.9		3.27		2.18		0		4.8
		52.6	100	15.62	100	52.6	100	56.5	99.45	49.3	100	49.6	100	51.5	100	59.9	100	42.6	99.99	47.9	100	60	100	62.9	100	53.8	100	48.5	100	44	100	61.3	100	59.65	100	39.6	100	61.2	100	52.6	100	61.33	100	61	100	57.6	100	47.9	100
Lv		35.9	43.45	84.3	77.46	45.8	64.62	42.2	18.95	50.2	21.12	49.5	30.9	41.5	17.59	37.4	12.29	57.3	31.93	42.6	32.89	37.66	28.3	36.4	23.62	44.1	33.1	49.9	22.64	55.2	15.57	37.9	19.26	36.66	26.39	58.4	33.56	37.9	35.88	43	26.97	34.33	29.12	35.32	34.9	41.6	15.14	48.1	24.13
Ls			17.54		0		24.03		49.76		52.39		47.67		56.86		73.79		55.84		55.39		37.17		42.85		42.85		17.23		55.45		53.56		42.71		37.67		21.89		49.31		38.84		41.55		46.39		54.67
Lm			39.01		22.54		11.35		31.27		26.49		21.42		25.55		13.92		12.21		11.72		34.53		33.51		24.05		60.13		28.98		27.18		30.9		28.77		42.23		23.72		32.04		23.55		38.47		21.2
		35.9	100	84.3	100	45.8	100	42.2	99.98	50.2	100	49.5	99.99	41.5	100	37.4	100	57.3	99.98	42.6	100	37.66	100	36.4	99.98	44.1	100	49.9	100	55.2	100	37.9	100	36.66	100	58.4	100	37.9	100	43	100	34.33	100	35.32	100	41.6	100	48.1	100
Qp		32.9	9.13	84.3	22.54	41.8	7.17	40.6	11.34	47.6	10.5	47.5	9.68	41.3	12.1	28.8	9.03	48.6	12.96	46.5	9.25	34.98	27.63	36.4	14.56	42.5	14.11	46.2	20.79	52.8	23.86	36.9	8.13	32	26.07	56.5	11.15	36.5	40	41.5	6.27	29.33	28.4	32.33	17.5	41.6	12.03	45.6	15.35
Lv			47.41		77.46		70.83		19.7		22.26		32.22		17.67		15.97		37.66		40.86		30.47		23.62		34.35		24.45		16.28		19.78		30.18		34.69		37.26		27.95		34.09		38.13		15.14		25.43
Lsm			43.46		0		22		68.96		67.24		58.1		70.23		75		49.38		49.89		41.9		61.81		51.54		54.76		59.86		72.09		43.75		54.16		22.74		65.78		37.51		44.37		72.83		59.22
		32.9	100	84.3	100	41.8	100	40.6	100	47.6	100	47.5	100	41.3	100	28.8	100	48.6	100	46.5	100	34.98	100	36.4	99.99	42.5	100	46.2	100	52.8	100	36.9	100	32	100	56.5	100	36.5	100	41.5	100	29.33	100	32.33	100	41.6	100	45.6	100
[truncated: 16 more columns]
